# Supplementary material for: Context-specific network modeling identifies new crosstalk in β-adrenergic cardiac hypertrophy
Source: PubMed Central journal article supplement (PMC7781532; doi:10.1371/journal.pcbi.1008490), 2020-12-18

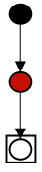

ISO

| Inhibited Component | Measured Component | Experiment | Not-tuned Model | Tuned Model |
|---------------------|--------------------|------------|-----------------|-------------|
| aAR                 | aMHC               |            | LH              | LH          |
|                     | ANP                |            |                 |             |
| Akt                 | bMHC               |            |                 |             |
|                     | ANP                | ML         |                 |             |
| AT1R                | CREB               |            |                 | LL          |
|                     | ERK12              | ML         |                 | LL          |
|                     | JNK                | LL         |                 | LL          |
|                     | MEK12              | ML         |                 | LL          |
| p38                 | p38                | LL         |                 | LL          |
|                     | Raf1               | ML         |                 | LL          |
|                     | ANP                |            |                 |             |
|                     | BNP                |            |                 |             |
| Calcium             | ERK12              |            |                 |             |
|                     | sACT               |            |                 |             |
|                     | Akt                |            |                 |             |
|                     | aMHC               |            |                 |             |
| CaMK                | ANP                | ML         |                 |             |
|                     | bMHC               |            |                 |             |
|                     | BNP                |            |                 |             |
|                     | Calcium            |            |                 |             |
| CaMK                | Calcium            | LL         |                 |             |
|                     | CArea              |            |                 |             |
|                     | ERK12              |            |                 |             |
|                     | sACT               |            |                 |             |
| cAMP                | ERK12              |            |                 |             |
|                     | ERK12              | ML         |                 | LL          |
| CaN                 | NFAT               |            |                 |             |
|                     | CArea              |            |                 |             |
|                     | ERK12              |            |                 |             |
|                     | Raf1               |            |                 |             |
| CaN                 | ANP                | LL         |                 |             |
|                     | Calcium            | LL         |                 |             |
|                     | CArea              | LL         |                 |             |
|                     | ERK12              | ML         |                 |             |

ISO

| Inhibited Component | Measured Component | Experiment | Not-tuned Model | Tuned Model |
|---------------------|--------------------|------------|-----------------|-------------|
| GBG                 | ERK12              |            |                 |             |
|                     | HDAC               | CArea      |                 |             |
| MEK12               | CREB               |            |                 |             |
|                     | AC                 | cAMP       |                 |             |
| NFkB                | CArea              |            |                 |             |
|                     | Gaq11              | ERK12      |                 | LL          |
| CaM                 | ERK12              |            |                 |             |
|                     | p38                | ANP        |                 |             |
| Akt                 | Akt                |            |                 |             |
|                     | Akt                | HL         | HL              | HL          |
|                     | Akt                | ML         | HL              | HL          |
|                     | ANP                |            |                 |             |
| PI3K                | ANP                | HL         |                 |             |
|                     | ERK12              |            |                 |             |
|                     | aMHC               |            |                 |             |
|                     | aMHC               |            | HL              | LH          |
| bMHC                | ANP                |            |                 |             |
|                     | BNP                |            |                 |             |
|                     | ERK12              |            |                 |             |
|                     | ERK12              | ML         |                 | LL          |
| PKA                 | SERCA              |            |                 |             |
|                     | ERK12              |            |                 |             |
|                     | CArea              |            |                 |             |
|                     | NFAT               | LL         |                 |             |
| PKC                 | ERK12              |            |                 |             |
|                     | ERK12              | ML         |                 | LL          |
|                     | ERK12              | ML         | HL              | HL          |
|                     | NFAT               |            |                 |             |
| PKD                 | ANP                |            |                 |             |
|                     | ANP                | ML         |                 |             |
|                     | CArea              |            |                 |             |
|                     | Calcium            |            |                 |             |

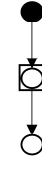

ISO

| Measured Component | Experiment | Not-tuned Model | Tuned Model |
|--------------------|------------|-----------------|-------------|
| AC                 |            |                 |             |
| AC                 | MH         | HH              | LH          |
| AC                 | HH         | HH              | HH          |
| AC                 | HH         | HH              | HH          |
| AC                 | HH         | HH              | HH          |
| AC                 | HH         | HH              | HH          |
| AC                 | HH         | HH              | HH          |
| AC                 | HH         | HH              | HH          |
| Akt                |            |                 |             |
| Akt                | MH         | HH              | MH          |
| Akt                | MH         | HH              | MH          |
| ATF2               | LH         | HH              | LH          |
| Calcium            |            |                 |             |
| Calcium            | MH         | HH              | MH          |
| Calcium            | MH         | MH              | LH          |
| Calcium            | MH         | HH              | MH          |
| Calcium            | MH         | HH              | MH          |
| CaM                |            |                 |             |
| CaMK               |            |                 |             |
| CaMK               | LH         | HH              | HH          |
| cAMP               |            |                 |             |
| cAMP               | LH         | HH              | LH          |
| cAMP               | HH         | HH              | HH          |
| cAMP               | HH         | HH              | HH          |
| cAMP               | HH         | HH              | HH          |
| CaN                |            |                 |             |
| CaN                | LH         | HH              | HH          |
| CaN                | LH         | HH              | HH          |
| cFos               |            |                 |             |
| cJun               |            | HH              | LH          |
| CREB               |            |                 |             |
| CREB               | MH         | HH              | LH          |
| CREB               | MH         | HH              | LH          |
| CREB               | MH         | HH              | MH          |
| CREB               | MH         | HH              | MH          |
| ELK1               |            |                 |             |
| ELK1               | LH         | HH              | LH          |
| Ras                |            |                 |             |
| Ras                | MH         | HH              | MH          |

ISO

| Measured Component | Experiment | Not-tuned Model | Tuned Model |
|--------------------|------------|-----------------|-------------|
| ERK12              |            |                 |             |
| ERK12              | MH         | HH              | MH          |
| ERK12              | MH         | HH              | MH          |
| ERK12              | LH         | HH              | MH          |
| GATA4              |            |                 |             |
| GATA4              | LH         | HH              | MH          |
| GBG                |            |                 |             |
| GSK3B              |            |                 |             |
| GSK3B              | LL         | HL              | LL          |
| HDAC               |            |                 |             |
| JAK                |            |                 |             |
| JAK                | LH         |                 |             |
| JNK                |            |                 |             |
| JNK                | MH         | HH              | MH          |
| MEK12              |            |                 |             |
| MEK12              | MH         | HH              | MH          |
| NFAT               |            |                 |             |
| NFAT               | LH         | HH              | LH          |
| NFAT               | LH         | HH              | LH          |
| p38                |            |                 |             |
| p38                | MH         | HH              | MH          |
| p38                | LH         | HH              | MH          |
| p70s6k             |            |                 |             |
| p70s6k             | MH         | HH              | MH          |
| PI3K               |            |                 |             |
| PI3K               | MH         | HH              | MH          |
| PKA                |            |                 |             |
| PKA                | HH         | HH              | HH          |
| PKC                |            |                 |             |
| PKC                | LH         | LH              | LH          |
| PKD                |            |                 |             |
| PKD                | LH         | LH              | LH          |
| Rac1               |            |                 |             |
| Raf1               |            |                 |             |
| Raf1               | MH         | HL              | MH          |
| STAT               |            |                 |             |
| STAT               | LH         |                 |             |

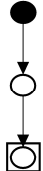

ISO

| Measured Component | Experiment | Not-tuned Model | Tuned Model |
|--------------------|------------|-----------------|-------------|
| aMHC               |            |                 |             |
| aMHC               | LL         |                 | LL          |
| aMHC               | LL         | HL              | LL          |
| aMHC               | LL         | HL              | ML          |
| ANP                |            |                 |             |
| ANP                | MH         | HH              | LH          |
| ANP                | LH         | HH              | LH          |
| ANP                | LH         | HH              | LH          |
| ANP                | MH         | HH              | LH          |
| bMHC               |            |                 |             |
| bMHC               | LH         | HH              | LH          |
| bMHC               | LH         | HH              | LH          |
| bMHC               | LH         | HH              | LH          |
| bMHC               | MH         | HH              | LH          |
| BNP                |            |                 |             |
| BNP                | MH         | HH              | LH          |
| BNP                | ML         |                 |             |
| CArea              |            |                 |             |
| CArea              | LH         | HH              | LH          |
| CArea              | LH         | HH              | LH          |
| CArea              | LH         | HH              | LH          |
| CArea              | LH         | HH              | LH          |
| sACT               |            |                 |             |
| sACT               | LH         | HH              | LH          |
| SERCA              |            |                 |             |
| SERCA              | LL         | HL              | LL          |

ISO

Overexpressed Component

PE

PDK1

Akt

GSK3B

| Measured Component | Experiment | Not-tuned Model | Tuned Model |
|--------------------|------------|-----------------|-------------|
| PKD                | MH         | HH              | H           |
| ANP                | MH         |                 |             |
| ANP                | LH         |                 |             |
| ANP                | ML         |                 |             |

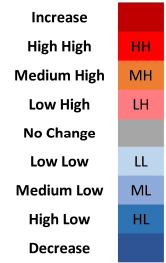

Supplement: pcbi.1008490.s012.pdf [file pcbi.1008490.s012.pdf]
